# Supplementary material for: Green tea catechins alleviate autoimmune symptoms and visual impairment in a murine model for human chronic intraocular inflammation by inhibiting Th17-associated pro-inflammatory gene expression
Source: PubMed Central journal article supplement (PMC6381204; doi:10.1038/s41598-019-38868-1), 2019-02-19
Supplement: 41598_2019_38868_MOESM1_ESM.pdf [file 41598_2019_38868_MOESM1_ESM.pdf]

**Green tea catechins alleviate autoimmune symptoms and visual impairment in a murine model for human chronic intraocular inflammation by inhibiting Th17-associated pro-inflammatory gene expression**

<sup>1,2</sup>Jian Li, MD, PhD, <sup>1</sup>Yolanda Wong Ying Yip, MSc, <sup>3</sup>Jialin Ren, PhD, <sup>4</sup>Wing Ki Hui, MBBS, <sup>1</sup>Jing Na He, MSc, <sup>3</sup>Qiu Xiao Yu, MSc, <sup>1</sup>Kai On Chu, PhD, <sup>1</sup>Tsz Kin Ng, PhD, <sup>3</sup>Sun On Chan, DPhil, <sup>1</sup>Chi Pui Pang, DPhil, <sup>1</sup>Wai Kit Chu, DPhil\*

<sup>1</sup>Department of Ophthalmology & Visual Sciences, The Chinese University of Hong Kong, Hong Kong

<sup>2</sup>Department of Ophthalmology, Affiliated Hangzhou First People's Hospital, Zhejiang University School of Medicine, Hangzhou, China

<sup>3</sup>School of Biomedical Sciences, The Chinese University of Hong Kong, Hong Kong

<sup>4</sup>Bachelor of Medicine and Bachelor of Surgery Programme, The Chinese University of Hong Kong

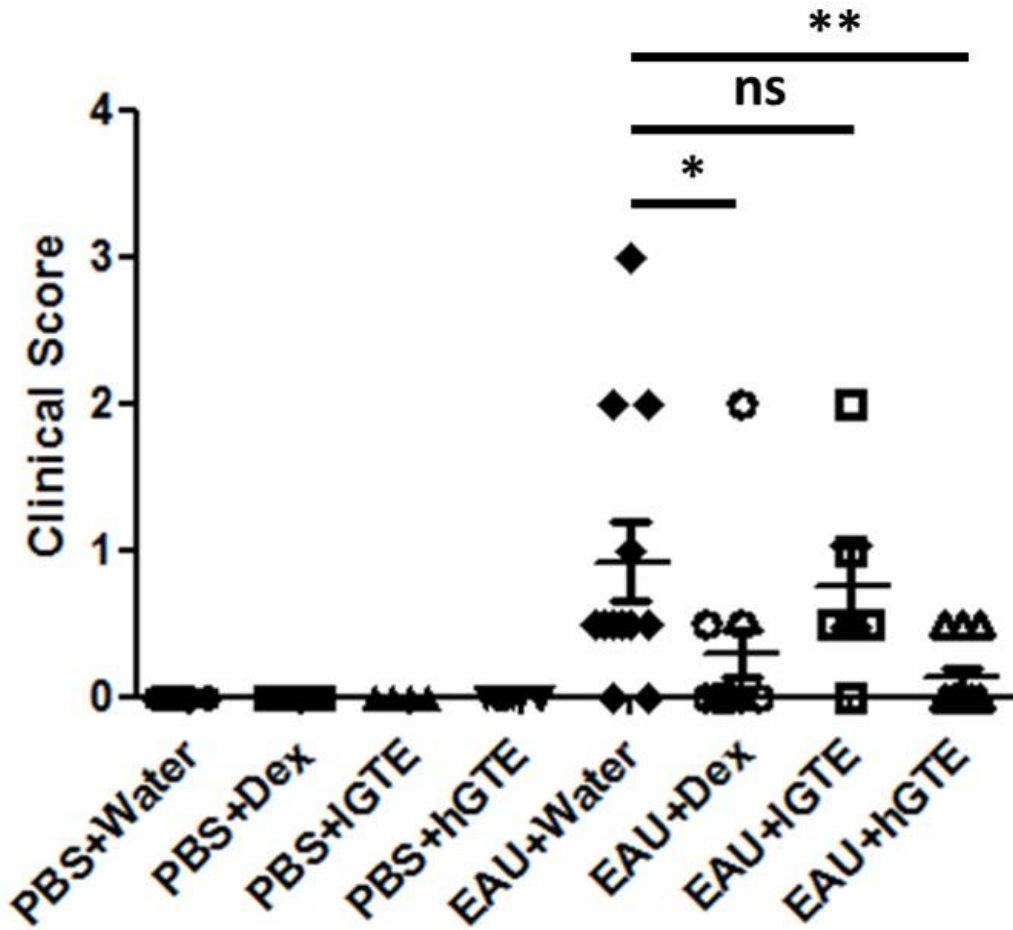

**Figure S1. Clinical scores of the inflammatory features.** The clinical scores were reduced significantly after Dex and hGTE treatment, but not after IGTE treatment. Individual data points are shown. Data are also presented as mean  $\pm$  SEM and analyzed by Mann–Whitney  $U$  test (\*  $P < 0.05$ , \*\*  $P < 0.01$ , ns = no significance).

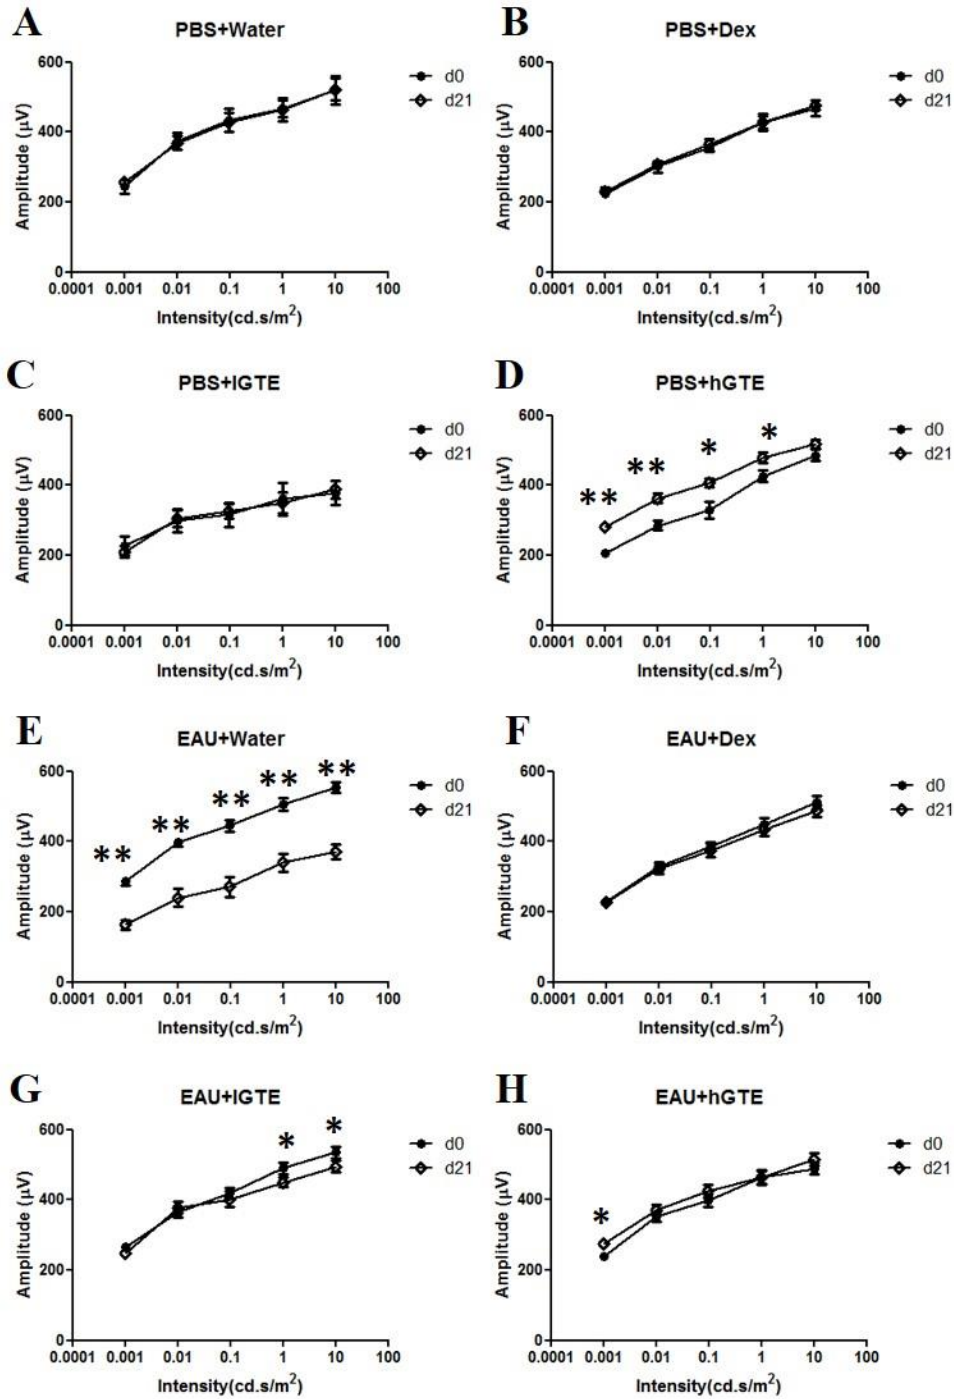

**Figure S2. Intra-group comparisons of scotopic ERG amplitudes between baseline (d0) and d21pi.** Scotopic amplitudes were not changed significantly during the 21-day experiment in non-induced groups treated with water, Dex and IGTE (A to C). Increases of scotopic ERG

amplitudes were observed in PBS+hGTE (**D**). Scotopic ERG amplitudes were decreased significantly by EAU induction (**E**). Scotopic ERG amplitudes in IGTE-treated EAU animals were slightly decreased at d21pi (**G**). Dex (**F**) and hGTE treatments (**H**) maintained the scotopic ERG amplitudes during the EAU induction. Data are presented as mean  $\pm$  SEM. Wilcoxon Signed-Rank test was used for paired comparisons (\*  $P < 0.05$ , \*\*  $P < 0.01$ ).

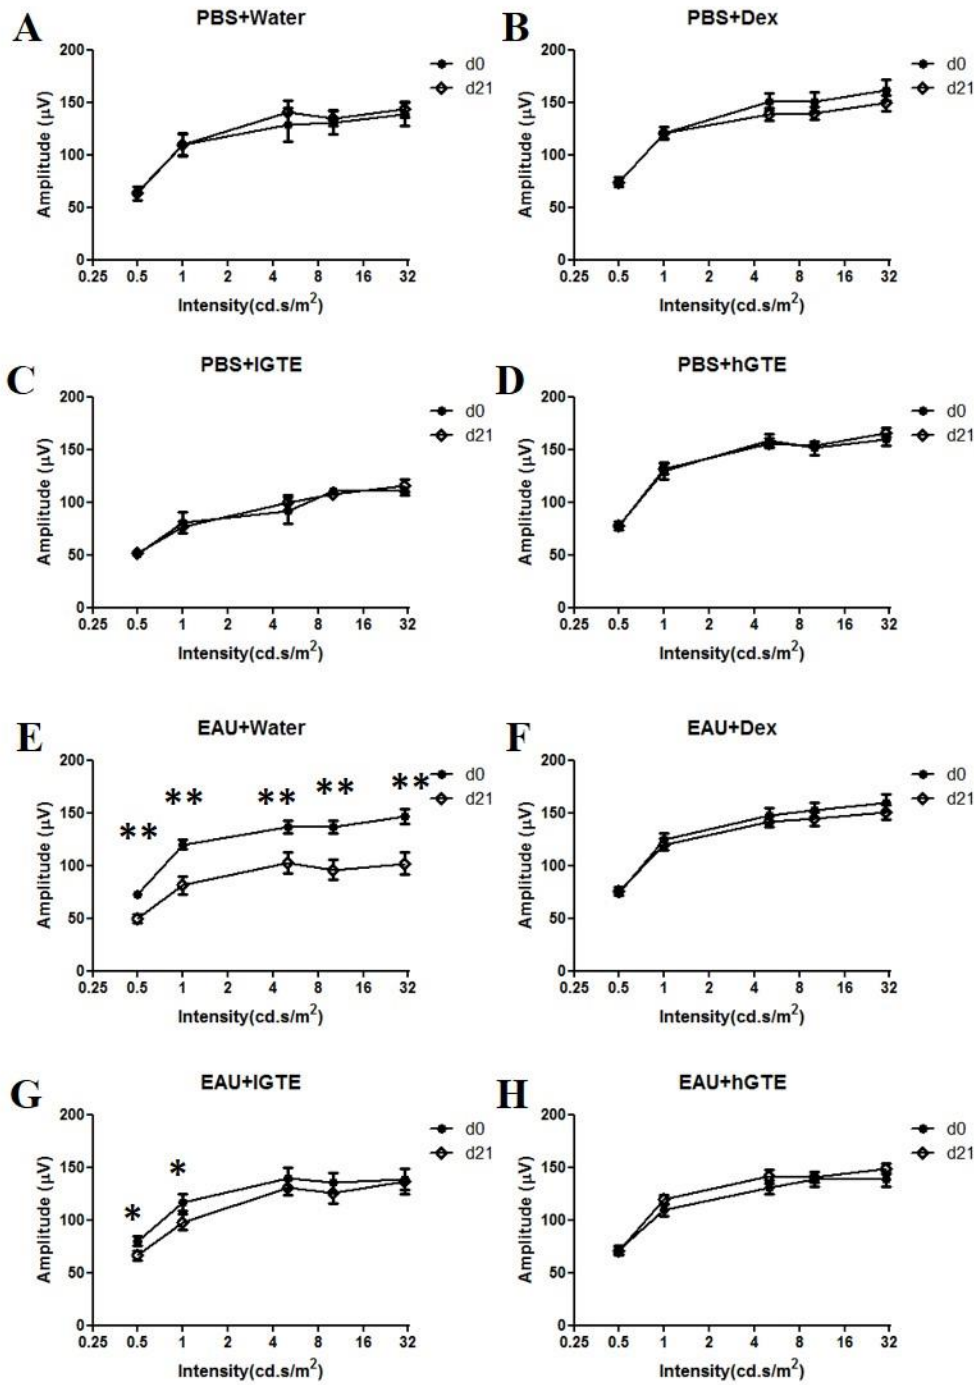

**Figure S3. Intra-group comparisons of photopic ERG amplitudes between baseline (d0) and d21pi.** Photopic amplitudes were not changed significantly during the 21-day experiment in non-induced groups treated with water, Dex, IGTE and hGTE (A to D). Photopic ERG

amplitudes were decreased significantly by EAU induction (**E**). Photopic ERG amplitudes in IGTE-treated EAU animals were slightly decreased at d21pi (**G**). Dex (**F**) and hGTE treatments (**H**) maintained the photopic ERG amplitudes during the EAU induction. Data are presented as mean  $\pm$  SEM. Wilcoxon Signed-Rank test was used for paired comparisons (\*  $P < 0.05$ , \*\*  $P < 0.01$ ).

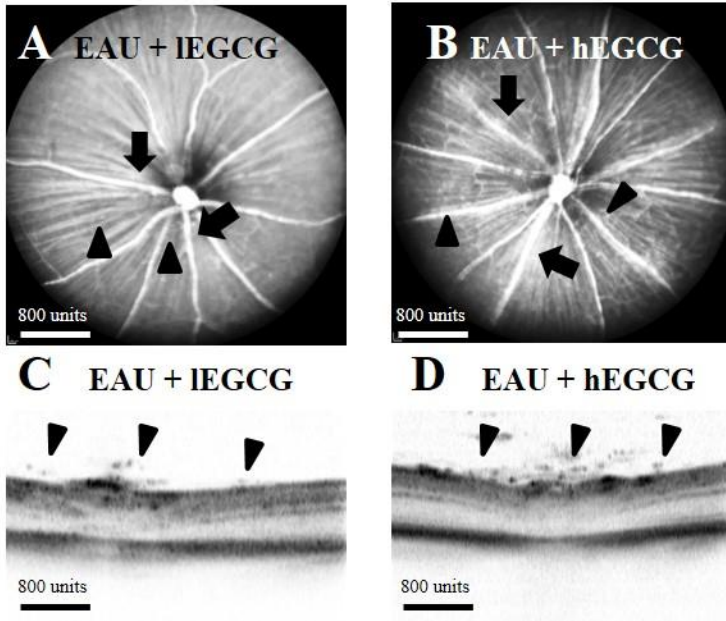

**Figure S4. Clinical manifestation of inflammation observed by cSLO (A and B) and SD-OCT (C and D). Infiltrating cells (*arrow heads*) and vasculitis (*arrows*) were observed in EAU animals treated with IEGCG and hEGCG.**

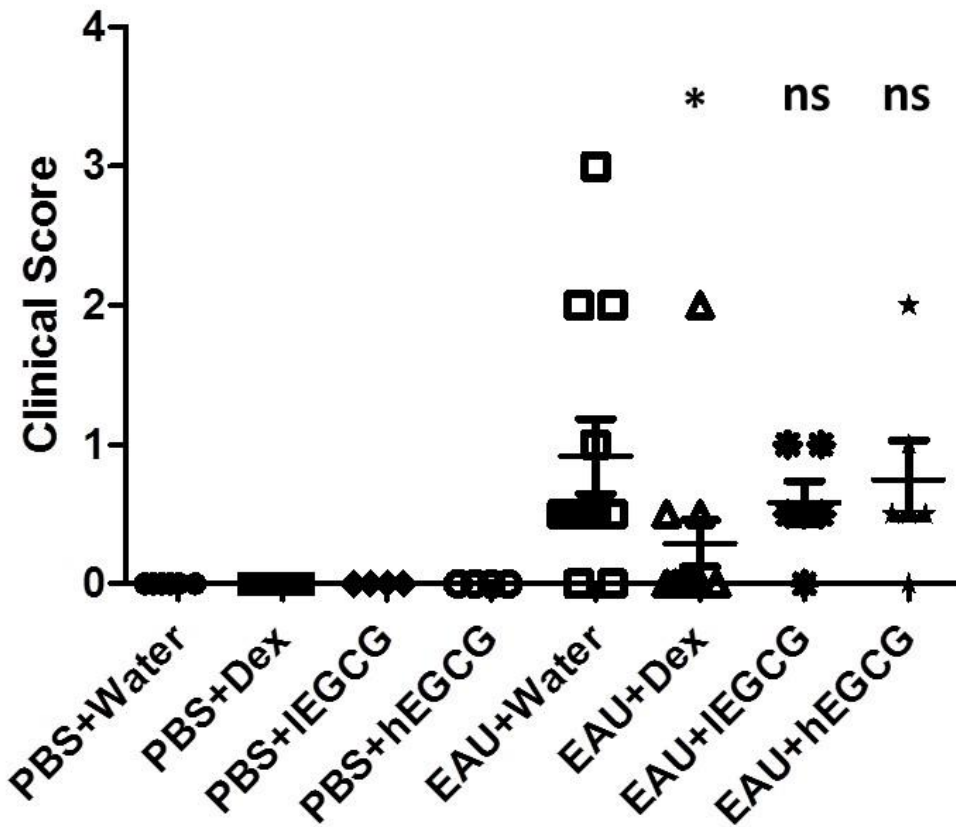

**Figure S5. Clinical scores of the inflammatory features.** The clinical scores in either IEGCG- or hEGCG-treated EAU group had no difference from EAU animals treated with water. Individual data points are shown. Data are also presented as mean  $\pm$  SEM and analyzed by Mann–Whitney U test (\*  $P < 0.05$ , ns = no significance).



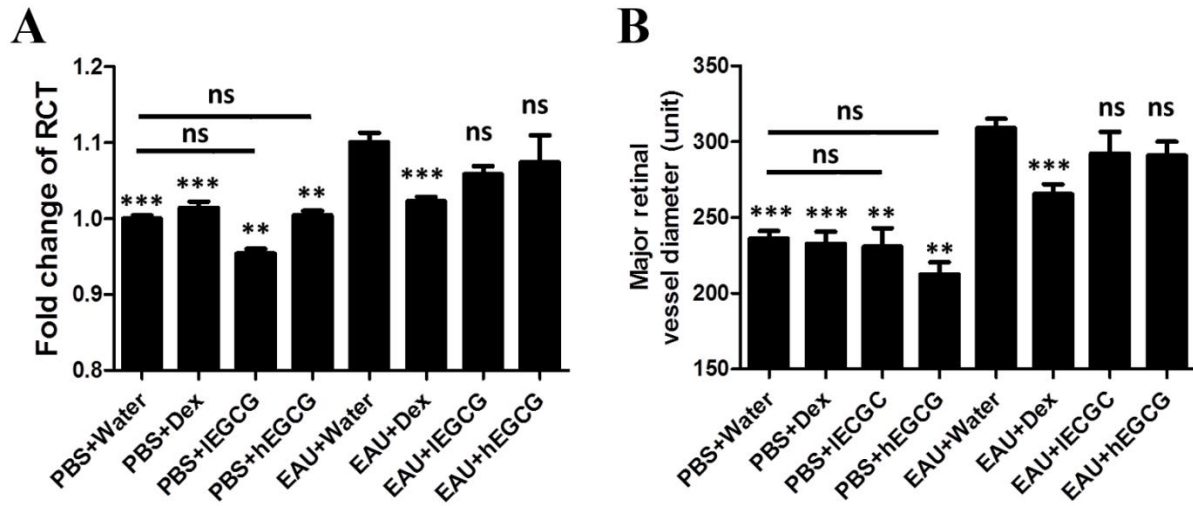

**Figure S6. The fold change of RCT (A) and the major retinal vessel diameter (B) assessments.** The asterisk marked above each bar represents the statistical significance of difference between EAU+Water group and the corresponding group. Data are presented as mean  $\pm$  SEM and analyzed by Mann–Whitney *U* test (\*\*\*  $P < 0.001$ , \*\*  $P < 0.01$ , ns = no significance).

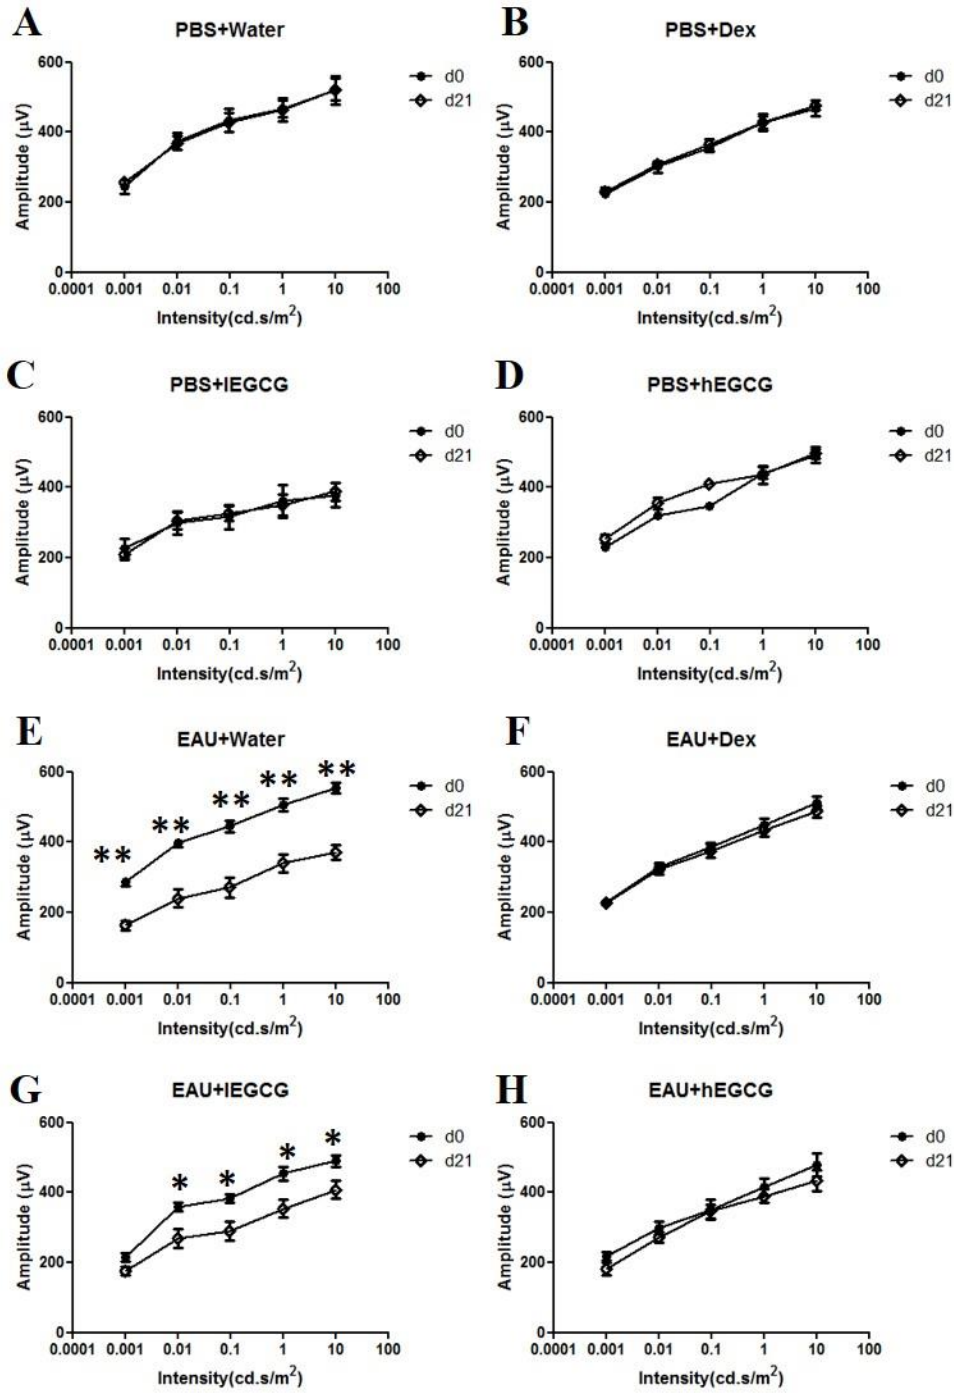

**Figure S7. Intra-group comparisons of scotopic ERG amplitudes between baseline (d0) and d21pi.** Scotopic amplitudes were not changed significantly during the 21-day experiment in non-induced groups treated with water, Dex and two doses of EGCG (A to D). Scotopic ERG

amplitudes were decreased significantly by EAU induction (**E**). Scotopic ERG amplitudes in IEGCG-treated EAU animals were also decreased significantly on d21pi (**G**). Dex (**F**) and hEGCG treatments (**H**) maintained the scotopic ERG amplitudes during EAU. Data are presented as mean  $\pm$  SEM. Wilcoxon Signed-Rank test was used for paired comparisons (\*  $P < 0.05$ , \*\*  $P < 0.01$ ).

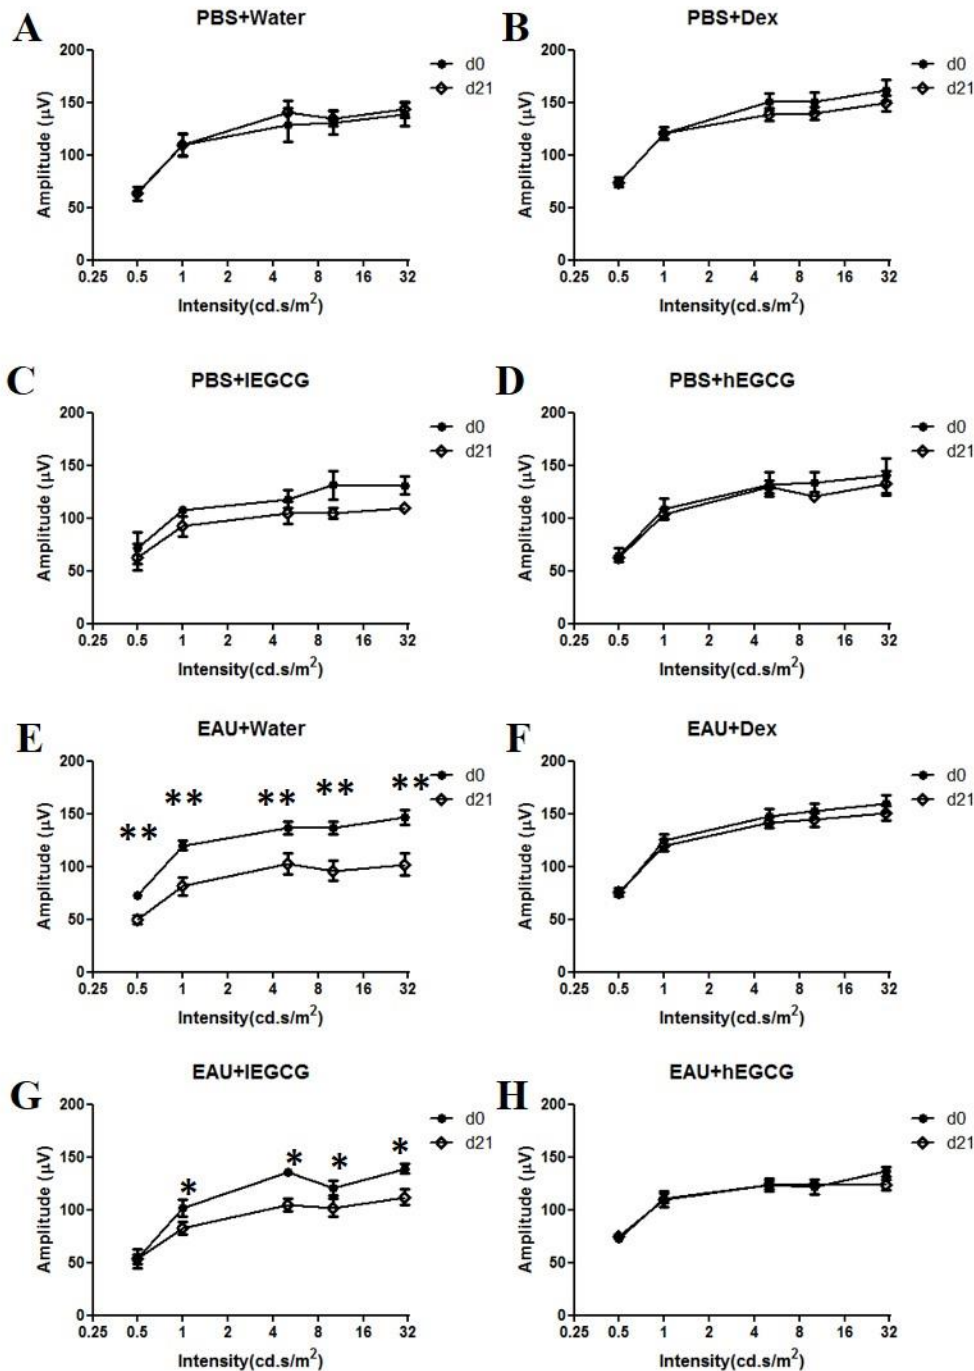

**Figure S8. Intra-group comparisons of photopic ERG amplitudes between baseline (d0) and d21pi.** Photopic amplitudes were not changed significantly during the 21-day experiment in non-induced groups treated with water, Dex, IEGCG, and hEGCG (**A to D**). Photopic ERG amplitudes were decreased significantly by EAU induction (**E**). Photopic ERG amplitudes in

IEGCG-treated EAU animals were decreased significantly on d21pi (**G**). Dex (**F**) and hEGCG treatments (**H**) maintained the photopic ERG amplitudes during EAU disease. Data are presented as mean  $\pm$  SEM. Wilcoxon Signed-Rank test was used for paired comparisons (\*  $P < 0.05$ , \*\*  $P < 0.01$ ).

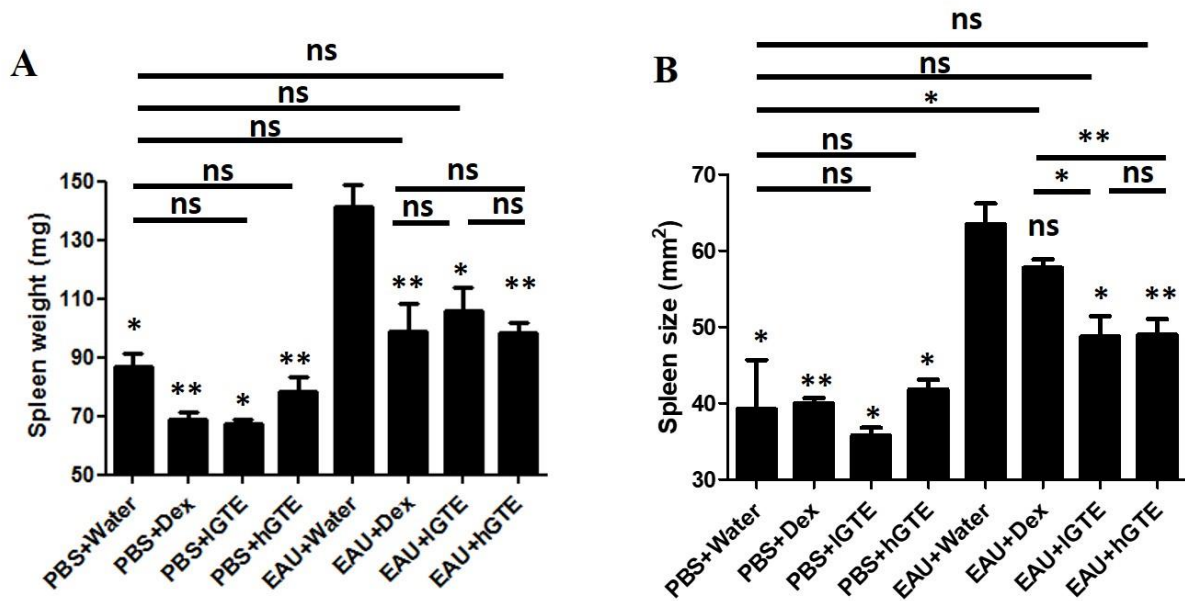

**Figure S9. Assessments of the spleen weight and spleen size after GTE treatments on d21pi.**

Spleen weight was increased significantly after EAU induction. The increased spleen weight caused by EAU was alleviated by Dex, IGTE, or hGTE treatment (**A**). Spleen size was increased significantly by EAU induction. The enlarged spleen size was attenuated by IGTE and hGTE, but not Dex (**B**). The asterisk marked above each bar represents the statistical significance of comparison between EAU+Water group and the corresponding group. Data are presented as mean  $\pm$  SEM and analyzed by Mann–Whitney *U* test (\*  $P < 0.05$ , \*\*  $P < 0.01$ , ns = no significance).

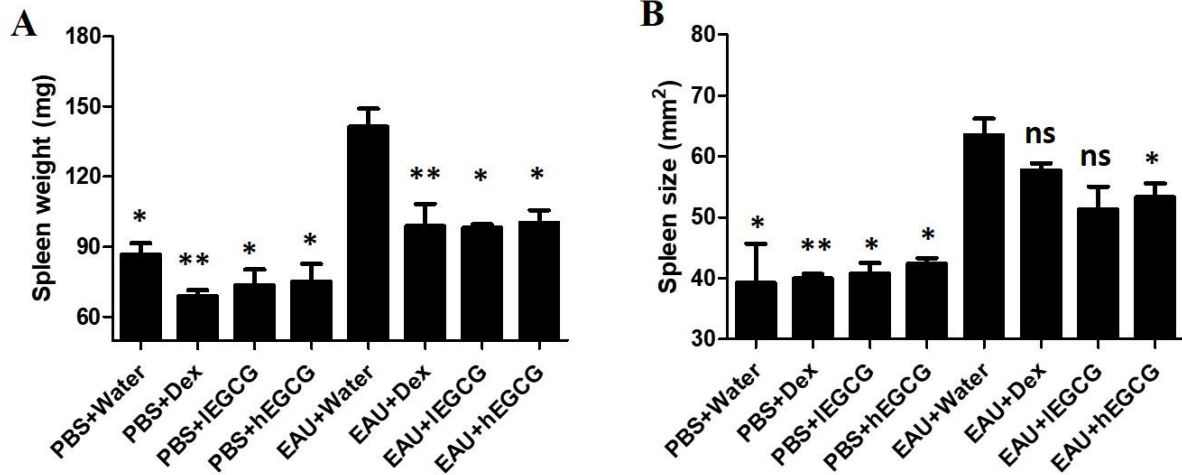

**Figure S10. Assessments of the spleen weight and spleen size after EGCG treatments on d21pi.** Spleen weight was increased significantly after EAU induction. The increased spleen weight caused by EAU was alleviated by Dex, IEGCG, or hEGCG treatment (**A**). Spleen size was increased significantly by EAU induction. The enlarged spleen size was attenuated by hEGCG, but not IEGCG and Dex (**B**). The asterisk marked above each bar represents the statistical significance of comparison between EAU+Water group and the corresponding group. Data are presented as mean  $\pm$  SEM and analyzed by Mann–Whitney *U* test (\*  $P < 0.05$ , \*\*  $P < 0.01$ , ns = no significance).

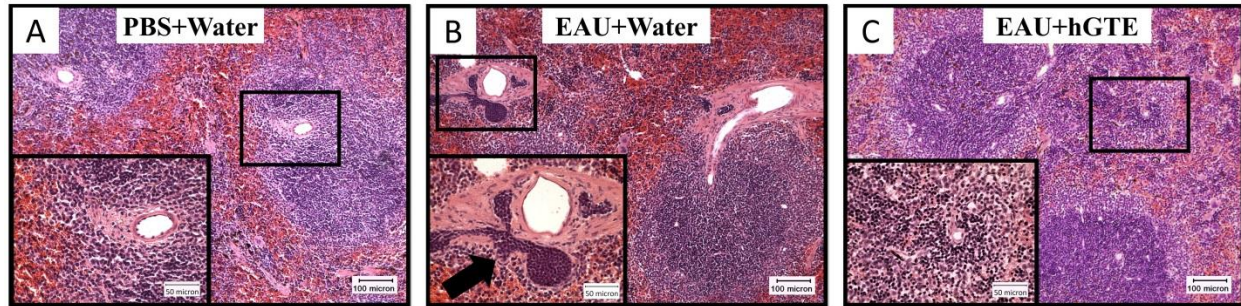

**Figure S11. Histological observations of spleen on d21pi.** No detectable defect was observed in spleen of PBS+Water group (**A**). Accumulated cells (*arrow*) were observed in spleen of EAU+Water group (**B**). hGTE treatment alleviated the cell infiltration in EAU mice (**C**). Selected areas are enlarged and shown on the bottom left corner.



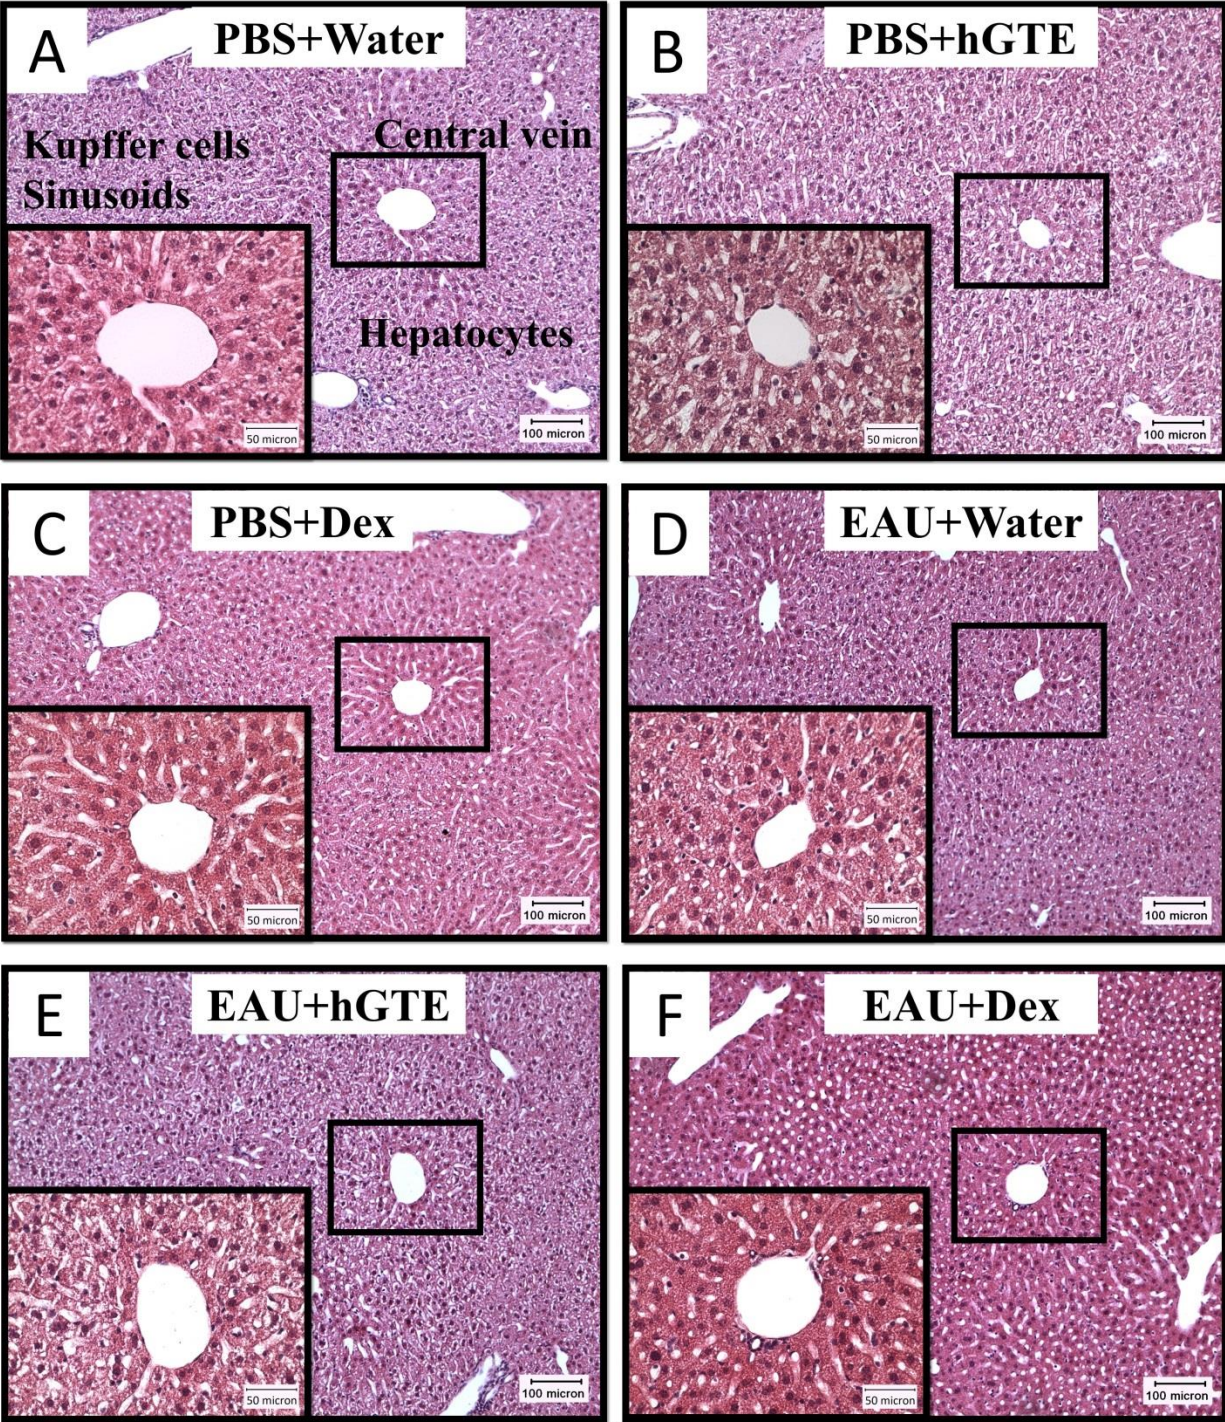

**Figure S12. Histological observations of liver on d21pi.** No detectable defect was observed in liver of non-induced animals fed with water, hGTE, and Dex (A to C). No detectable damage in

liver was observed in EAU animals treated with water, hGTE, and Dex (**D to F**). Selected areas are enlarged and shown on the bottom left corner.

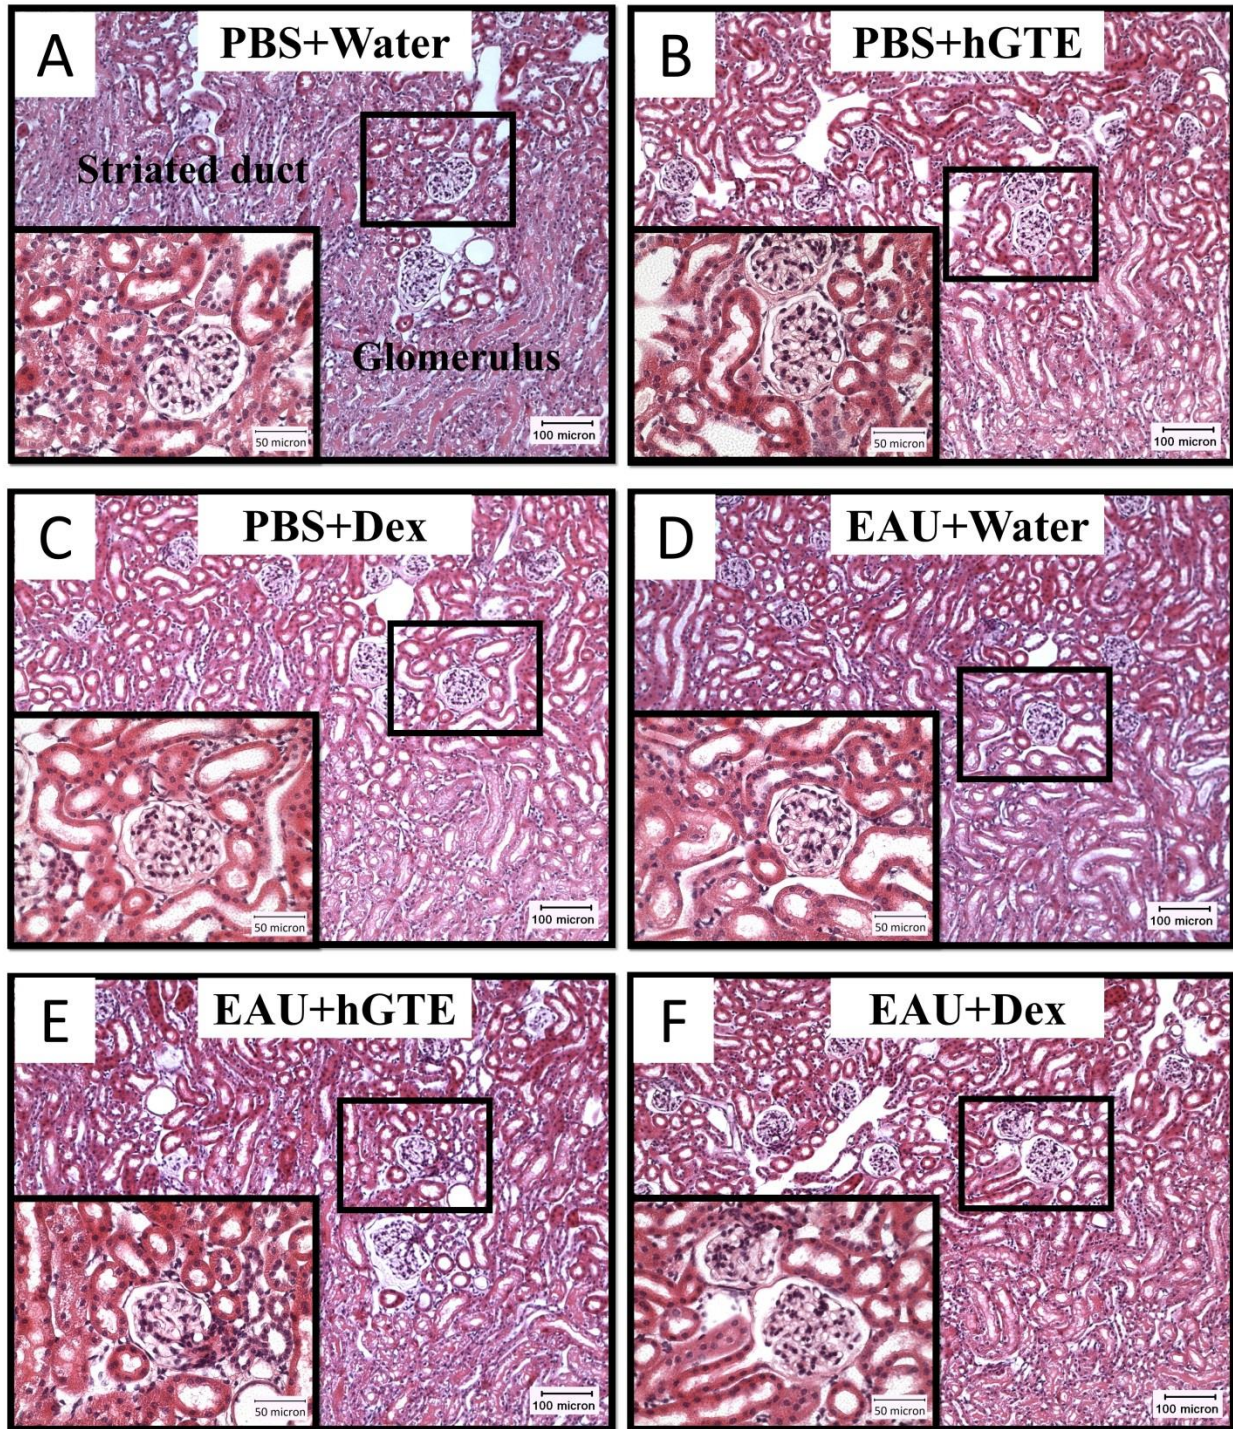

**Figure S13. Histological observations of kidney on d21pi.** No detectable defect was observed in kidney of non-induced animals fed with water, hGTE, and Dex (A to C). No detectable

damage in kidney was observed in EAU animals treated with water, hGTE, and Dex (**D to F**).

Selected areas are enlarged and shown on the bottom left corner.

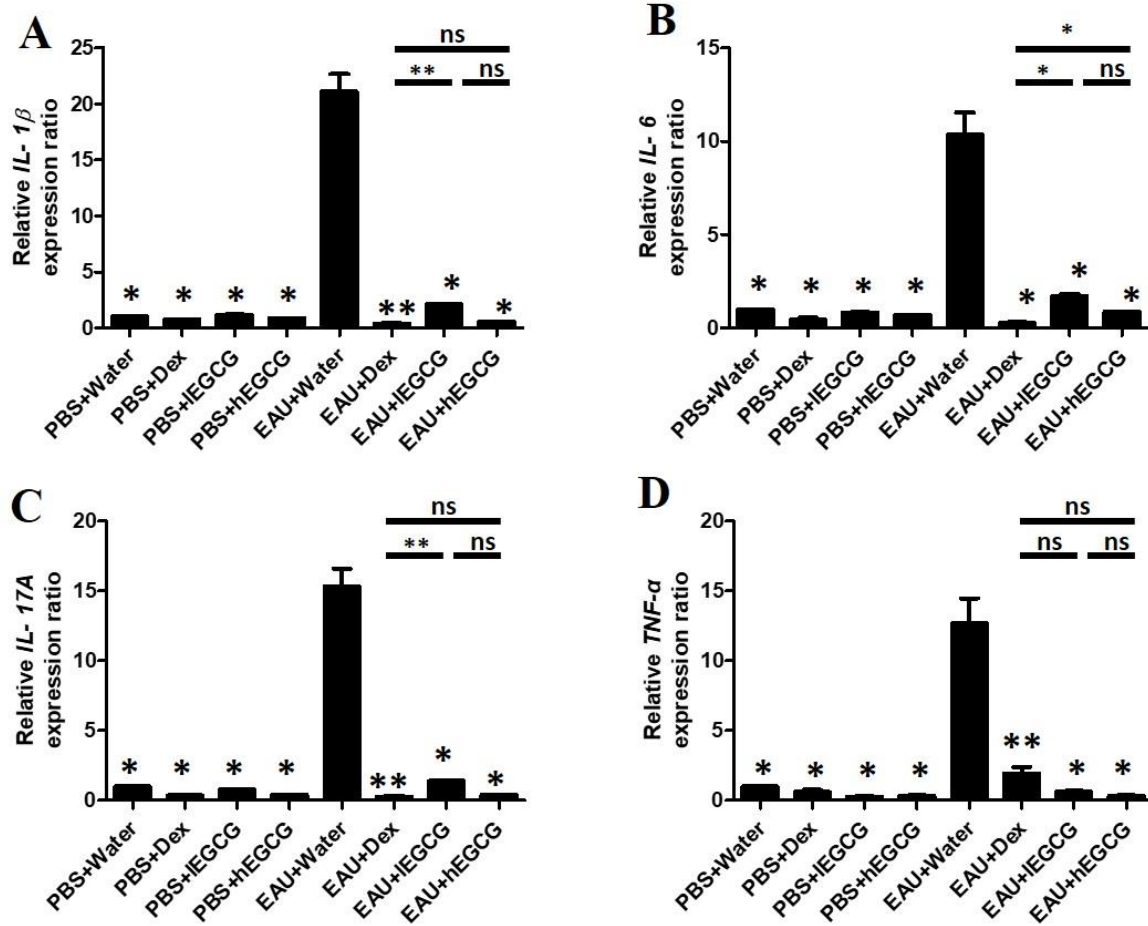

**Figure S14.** Effects of EGCG on *IL-1 $\beta$* , *IL-6*, *IL-17A*, and *TNF- $\alpha$*  mRNA expression in EAU retina. The asterisk marked above each bar represents the statistical significance of comparison between EAU+Water group and the corresponding group. Data are shown as mean  $\pm$  SEM and analyzed using Mann-Whitney *U* test (\*  $P < 0.05$ , \*\*  $P < 0.01$ , ns = no significance).

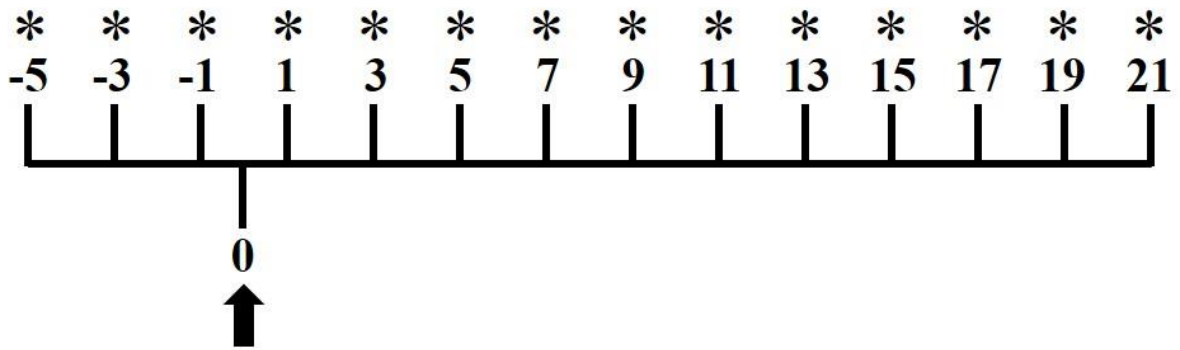

**Figure S15. Demonstration of the treatment strategy.** Mice were treated with controls, lower dose or higher dose of GTE or EGCG once per two days (asterisks) starting from 5 days prior to EAU induction (arrow) until day 21 postimmunization.

**Table S1**

Gene-specific primers for mouse *TNF- $\alpha$* , *IL-1 $\beta$* , *IL-6*, *IL-17A*, and  *$\beta$ -actin*.

---

|                                                                |                                        |
|----------------------------------------------------------------|----------------------------------------|
| Tumor necrosis factor alpha ( <i>TNF-<math>\alpha</math></i> ) |                                        |
| Forward                                                        | 5'- GCC ACC ACG CTC TTC TGT CT -3'     |
| Reverse                                                        | 5'- GGT CTG GGC CAT AGA ACT GAT G -3'  |
| Interleukin-1 beta ( <i>IL-1<math>\beta</math></i> )           |                                        |
| Forward                                                        | 5'- CAG CTC ATA TGG GTC CGA CA -3'     |
| Reverse                                                        | 5'- CTG TGT CTT TCC CGT GGA CC -3'     |
| Interleukin-6 ( <i>IL-6</i> )                                  |                                        |
| Forward                                                        | 5'- CTG CAA GAG ACT TCC ATC CAG -3'    |
| Reverse                                                        | 5'- AGT GGT ATA GAC AGG TCT GTT GG -3' |
| Interleukin-17A ( <i>IL-17A</i> )                              |                                        |
| Forward                                                        | 5'- AAG GCA GCA GCG ATC ATC C -3'      |
| Reverse                                                        | 5'- GGA ACG GTT GAG GTA GTC TGA G -3'  |
| Beta-actin ( <i><math>\beta</math>-actin</i> )                 |                                        |
| Forward                                                        | 5'- TGT TAC CAA CTG GGA CGA CA -3'     |
| Reverse                                                        | 5'- GGG GTG TTG AAG GTC TCA AA -3'     |

---
